# Supplementary material
Source: PubMed Central journal article supplement (PMC4542221)
Supplement: AEM.00324-15_zam999116561so1.pdf [file AEM.00324-15_zam999116561so1.pdf]

**Table S1.** Primer pairs described in the text and PCR conditions used in this study.

| Assay                 | Target                       | Primer pair                                                              | T <sub>m</sub> °C | Reference                                                |
|-----------------------|------------------------------|--------------------------------------------------------------------------|-------------------|----------------------------------------------------------|
| PCR + cloning<br>qPCR | General Bacteria<br>16S rRNA | 341F (5'-CCTACGGGAGGCAGCAG-3')<br>907R (5'-CCGCAATTCCTTTRAGTTT-3')       | 57<br>(58 qPCR*)  | Muyzer <i>et al.</i> , 1993<br>Lane <i>et al.</i> , 1985 |
| PCR + cloning<br>qPCR | Planctomycetes<br>16S rRNA   | Pla352F (5'-GGCTGCAGTCGAGRATCT-3')<br>Pla920R (5'-TGTGTGAGCCCCCGTCAA-3') | 58<br>(61 qPCR**) | Pollet <i>et al.</i> , 2011                              |

PCR conditions: 95°C 5 min; 40 × [95°C 1 min, T<sub>m</sub> 40 s, 72°C 1 min]; 72°C 5 min.

qPCR conditions: 95°C 4 min; 40 × [95°C 30 s, T<sub>m</sub> 40 s, 72°C 30 s]; 80°C 25 s.

\*qPCR efficiency 100%; R<sub>2</sub>=0.999

\*\*qPCR efficiency 85%; R<sub>2</sub>=0.998

**Table S2.** Distribution of percentage of reads of the 16S rRNA gene amplicon pyrosequencing in the Saxnäs Mosse and the Obukhovskoye peat bogs.

| <b>Saxnäs Mosse</b>                     | <b>12 cm</b> | <b>18 cm</b> | <b>24 cm</b> | <b>30 cm</b> | <b>42 cm</b> |
|-----------------------------------------|--------------|--------------|--------------|--------------|--------------|
| Acidobacteria                           | 60.5         | 51.4         | 54.8         | 47.6         | 30.0         |
| Planctomycetaceae <i>Isosphaera</i>     | 0.7          | 1.8          | 6.0          | 6.1          | 0.0          |
| Planctomycetaceae others:               | 4.0          | 2.5          | 0.7          | 1.1          | 0.4          |
| - <i>Gemmata</i>                        | 0.0          | 0.1          | 0.0          | 0.0          | 0.0          |
| - Pir4 lineage                          | 0.0          | 0.0          | 0.1          | 0.0          | 0.0          |
| - <i>Schlesneria</i>                    | 0.2          | 0.0          | 0.0          | 0.0          | 0.0          |
| - <i>Singulisphaera</i>                 | 0.1          | 0.1          | 0.0          | 0.0          | 0.0          |
| - <i>Zavarzinella</i>                   | 0.3          | 0.0          | 0.0          | 0.0          | 0.0          |
| - uncultured                            | 3.4          | 2.3          | 0.6          | 1.1          | 0.4          |
| Alphaproteobacteria Rhizobiales         | 9.1          | 7.0          | 3.5          | 2.0          | 2.3          |
| Alphaproteobacteria Rhodospirillales    | 4.6          | 3.3          | 0.7          | 0.7          | 0.1          |
| Deltaproteobacteria Syntrophobacterales | 0.43         | 5.9          | 8.3          | 23.0         | 5.7          |
| Verrucomicrobia                         | 8.2          | 15.9         | 13.2         | 5.8          | 5.1          |
| Thaumarchaeota terrestrial group        | 0.05         | 0.28         | 0.28         | 0.81         | 36.6         |
| Thaumarchaeota MCG                      | 0.00         | 0.00         | 0.03         | 0.3          | 6.3          |
| Actinobacteria                          | 1.4          | 1.0          | 0.05         | 0.06         | 0.3          |

| <b>Obukhovskoye</b>                     | <b>5-10 cm</b> | <b>10-20 cm</b> | <b>20-30 cm</b> | <b>30-40 cm</b> | <b>40-50 cm</b> |
|-----------------------------------------|----------------|-----------------|-----------------|-----------------|-----------------|
| Acidobacteria                           | 12.4           | 21.1            | 46.4            | 19.0            | 38.3            |
| Planctomycetaceae <i>Isosphaera</i>     | 7.7            | 4.6             | 3.0             | 52.7            | 12.6            |
| Planctomycetaceae others:               | 4.6            | 4.0             | 5.6             | 1.2             | 6.2             |
| - <i>Gemmata</i>                        | 0.4            | 0.1             | 0.1             | 0.0             | 0.1             |
| - <i>Planctomyces</i>                   | 0.3            | 0.7             | 1.2             | 0.2             | 0.7             |
| - <i>Schlesneria</i>                    | 0.1            | 0.0             | 0.1             | 0.0             | 0.0             |
| - <i>Singulisphaera</i>                 | 0.8            | 0.5             | 0.2             | 0.1             | 3.8             |
| - <i>Zavarzinella</i>                   | 0.1            | 0.0             | 0.3             | 0.1             | 0.0             |
| - uncultured                            | 2.9            | 2.7             | 3.8             | 0.9             | 1.7             |
| Alphaproteobacteria Rhizobiales         | 23.9           | 18.0            | 15.4            | 7.4             | 11.6            |
| Alphaproteobacteria Rhodospirillales    | 2.9            | 0.8             | 1.2             | 0.3             | 1.2             |
| Deltaproteobacteria Syntrophobacterales | 0.0            | 0.0             | 0.2             | 0.2             | 0.3             |
| Verrucomicrobia                         | 3.3            | 2.0             | 2.4             | 1.2             | 4.0             |
| Thaumarchaeota terrestrial group        | 0.0            | 0.0             | 0.0             | 0.0             | 0.1             |
| Thaumarchaeota MCG                      | 0.0            | 0.0             | 0.0             | 0.0             | 0.1             |
| Actinobacteria                          | 29.3           | 40.1            | 17.0            | 14.5            | 10.8            |

**Table S3.** Percentage of total bacterial reads attributed to members of the Planctomycetaceae family in the Saxnäs Mosse and the Obukhovskoye peat bogs.

| <b>Saxnäs Mosse</b> |                                                |                                            |                                           |                         |
|---------------------|------------------------------------------------|--------------------------------------------|-------------------------------------------|-------------------------|
| Depth (cm)          | % 16S rRNA reads Planctomycetaceae Isosphaera* | % 16S rRNA reads Planctomycetaceae others* | % 16S rRNA reads Planctomycetaceae TOTAL* | % Planctomycete cells** |
| 10-12               | 0.7                                            | 4.0                                        | 4.7                                       | 15.1                    |
| 16-18               | 1.8                                            | 2.5                                        | 4.3                                       | 2.3                     |
| 22-24               | 6.0                                            | 0.7                                        | 6.7                                       | 5.8                     |
| 28-30               | 6.1                                            | 1.1                                        | 7.2                                       | 2.8                     |
| 40-42               | 0.0                                            | 0.4                                        | 0.4                                       | 1.4                     |

  

| <b>Obukhovskoye</b> |                                                |                                            |                                           |                         |
|---------------------|------------------------------------------------|--------------------------------------------|-------------------------------------------|-------------------------|
| Depth (cm)          | % 16S rRNA reads Planctomycetaceae Isosphaera* | % 16S rRNA reads Planctomycetaceae others* | % 16S rRNA reads Planctomycetaceae TOTAL* | % Planctomycete cells** |
| 5-10                | 7.7                                            | 4.6                                        | 12.3                                      | 8.8                     |
| 10-20               | 4.6                                            | 4.0                                        | 8.6                                       | 3.9                     |
| 20-30               | 3.0                                            | 5.6                                        | 8.6                                       | 3.5                     |
| 30-40               | 52.7                                           | 1.2                                        | 53.9                                      | 27.1                    |
| 40-50               | 12.6                                           | 6.2                                        | 18.8                                      | 9.5                     |

\*Percentage of 16S rRNA gene reads obtained from the pyrosequencing analysis as shown in Table S2.

\*\*Percentage of planctomycete cells respect to the total bacterial cells assuming that the average 16S rRNA copy number per bacterial cell is 3.6 (Schloss et al., 2009), and that planctomycetes have an average of 2.5 copies of 16S rRNA gene per genome (considering 2 copies present in *Pirellula marina* and *Planctomyces* species, and 3 copies in *Isosphaera pallida*; Ribosomal RNA Operon Copy Number Database; Klappenbach et al., 2001). See Fig. S4 for details.

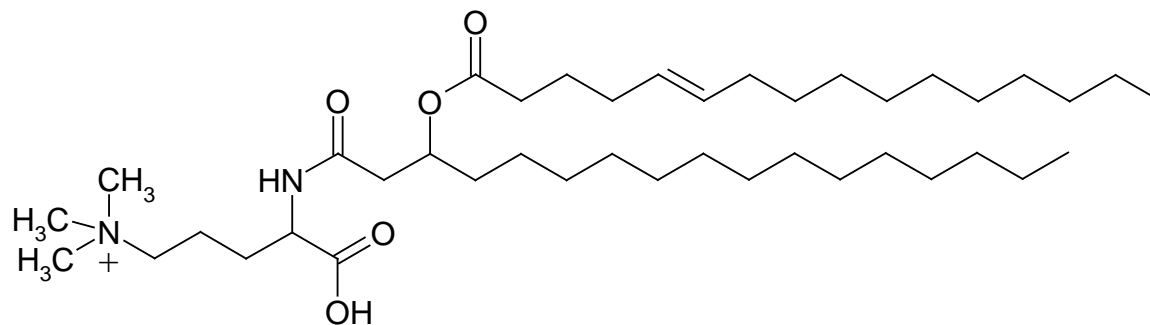

**Fig. S1.** Trimethylornithine (TMO) lipid structure.

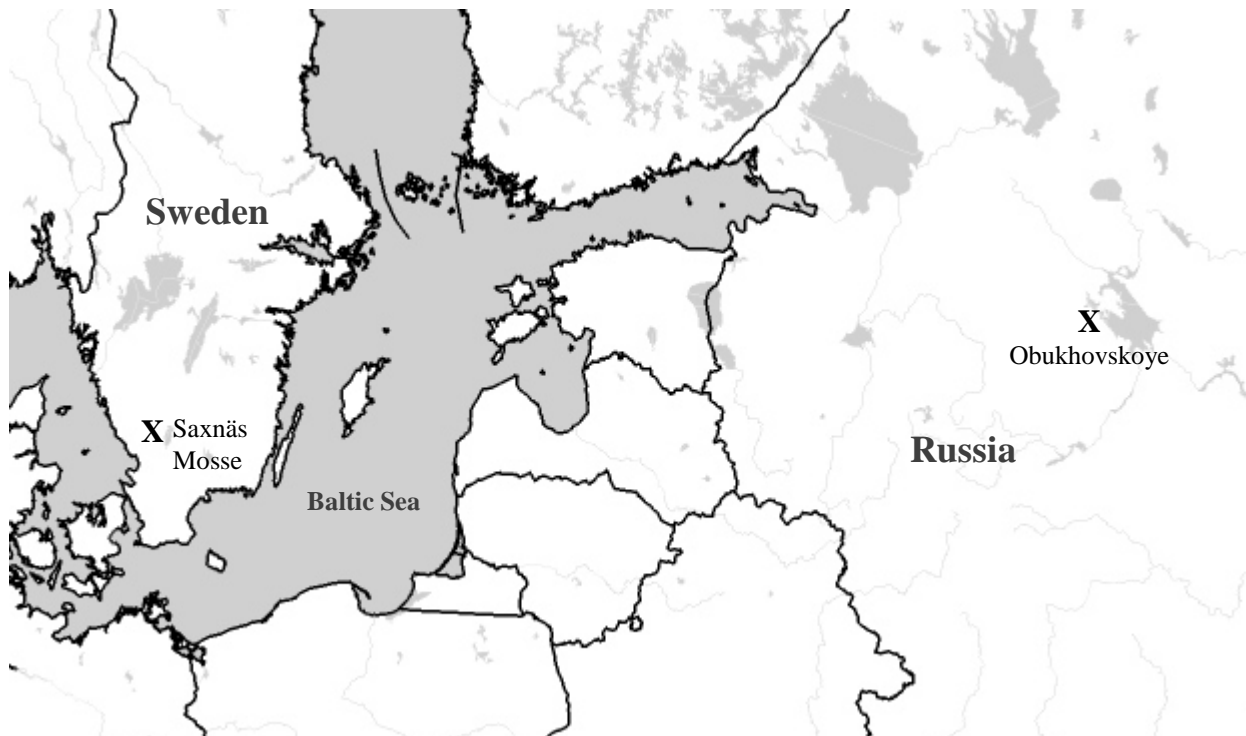

**Fig. S2.** Locations of peat sample collection in Russia ( $58^{\circ} 14' N$ ,  $38^{\circ} 12' E$ ) and Sweden ( $56^{\circ} 51' 20.78'' N$ ,  $13^{\circ} 27' 39.62'' E$ ).

**Fig. S3.** Phylogenetic tree including the representative pyrosequencing 16S rRNA gene reads (in bold) obtained from the Saxnäs Mosse peat bog samples and classified as Acidobacteria, and their closest relatives. Triangles indicate Acidobacteria strains or groups the lipid composition of which have been previously reported by Sinninghe Damsté et al., 2011.

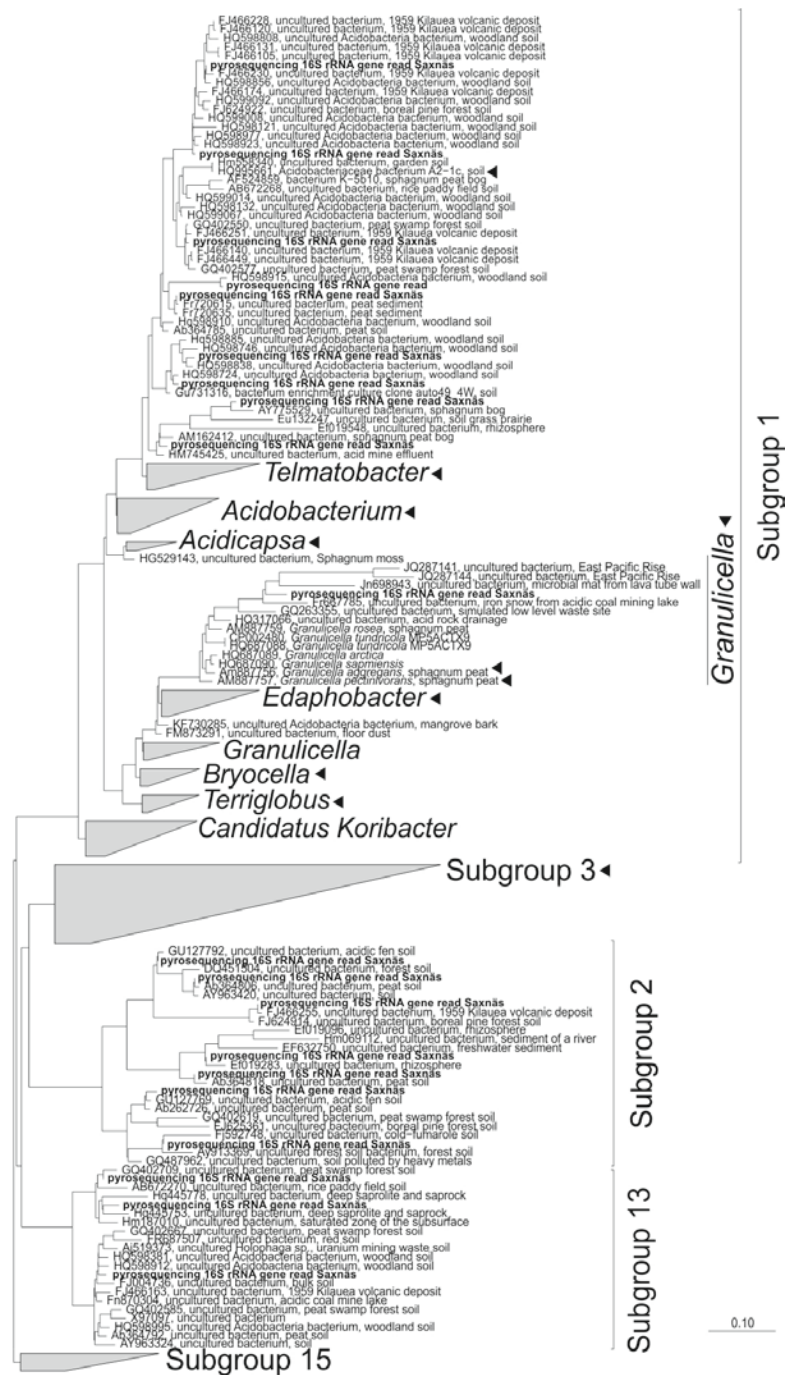

Subgroup 1

Granulicella

Subgroup 3

Subgroup 2

Subgroup 13

Subgroup 15

0.10

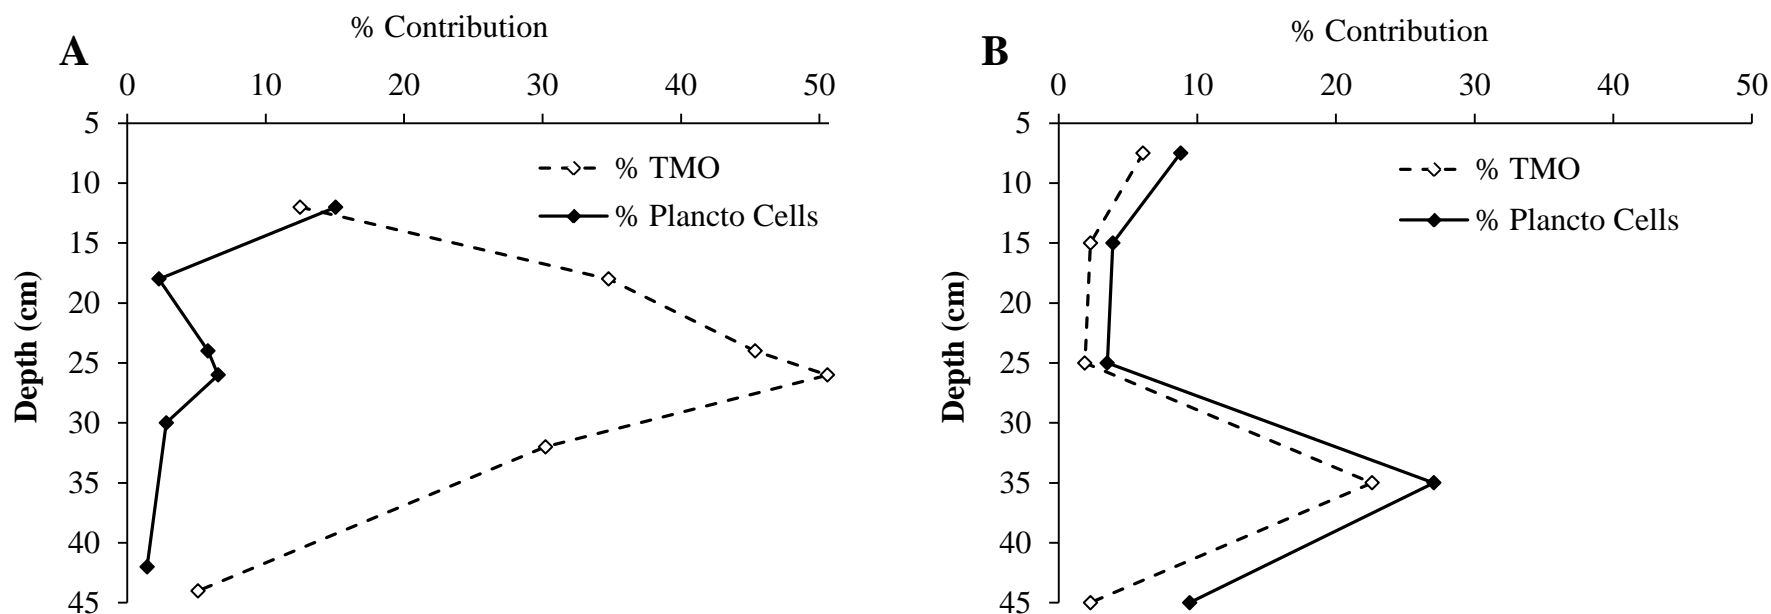

**Fig. S4.** Percent of total IPLs made up by trimethylornithine lipid (TMO) based on HPLC/MS base peak area; Planctomycete cells to total Bacterial cells based on the calculation of converting planctomycete and bacterial specific 16S rRNA gene copies to cell numbers in the (A) Saxnäs Mosse, and the (B) Obukhovskoye peat bogs. Total bacterial and planctomycete cell numbers were estimated assuming that the average 16S rRNA copy number per bacterial cell is 3.6 (Klappenbach et al., 2001), and that planctomyces have an average of 2.5 copies of 16S rRNA gene per genome (considering 2 copies present in *Pirellula marina* and *Planctomyces* species, and 3 copies in *Isosphaera pallida*; Ribosomal RNA Operon Copy Number Database; Göker et al., 2011).

## REFERENCES

1. **Muyzer G, Dewaal EC, Uitterlinden AG.** 1993. Profiling of complex microbial-populations by denaturing gradient gel-electrophoresis analysis of polymerase chain reaction-amplified genes-coding for 16S ribosomal-RNA. *Appl Environ Microbiol* **59**:695–700.
2. **Lane DJ, Pace B, Olsen GJ, Stahl DA, Sogin ML, Pace NR.** 1985. Rapid determination of 16S ribosomal RNA sequences for phylogenetic analyses. *P Natl Acad Sci USA* **82**:6955–6959.
3. **Pollet T, Tadonleke RD, Humbert JF.** 2011. Comparison of primer sets for the study of Planctomycetes communities in lentic freshwater ecosystems. *Environ Microbiol Rep* **3**:254–261.
4. **Schloss PD, Westcott SL, Ryabin T, Hall JR, et al.** 2009. Introducing mothur: Open-source, platform-independent, community-supported software for describing and comparing microbial communities. *Appl Environ Microbiol* **75**:7537–7541.
5. **Klappenbach JL, Saxman PR, Cole JR, Schmidt TM.** 2001. rrndb: the ribosomal RNA operon copy number database. *Nucleic Acids Res* **29**:181–184.
6. **Sinninghe Damsté JS, Rijpstra WIC, Hopmans EC, Weijers JWH, Foesel BU, Overmann J, Dedysh SN.** 2011. 13,16-Dimethyl Octacosanedioic Acid (iso-Diabolic Acid), a Common Membrane-Spanning Lipid of Acidobacteria Subdivisions 1 and 3. *Appl Environ Microbiol* **77**:4147–4154.
7. **Göker M, Cleland D, Saunders E.** 2011. Complete genome sequence of *Isosphaera pallida* type strain (IS1B<sup>T</sup>) *Stand Genomic Sci* **4**:63–71.
